# Supplementary material
Source: MDPI journal article supplement (https://www.mdpi.com/2073-4441/13/23/3456)
Supplement: s1 [file s1]

## Supplementary Materials

**Table S1:** Fitting parameters of linearly and randomly initialized maps

| Map | Plant A |        | Plant B |        |
|-----|---------|--------|---------|--------|
|     | mqe     | tge    | mqe     | tge    |
| 1   | 0.4332  | 0      | 0.3851  | 0.0267 |
| 2   | 0.4434  | 0.0833 | 0.4087  | 0.0800 |
| 3   | 0.4336  | 0.0208 | 0.4076  | 0.0933 |
| 4   | 0.4406  | 0.0208 | 0.3768  | 0      |
| 5   | 0.4412  | 0.0208 | 0.3818  | 0.0933 |
| 6   | 0.4215  | 0.0208 | 0.3980  | 0.2000 |
| 7   | 0.4381  | 0.0208 | 0.3852  | 0.0800 |
| 8   | 0.4360  | 0      | 0.4117  | 0.0267 |
| 9   | 0.4401  | 0.0208 | 0.3728  | 0      |
| 10  | 0.4228  | 0.0208 | 0.3788  | 0.0933 |
| 11  | 0.4354  | 0.0208 | 0.4033  | 0.1067 |

**Table S2.** Pearson correlation results for  $\Delta$  SUVA with others parameter of DOM

| $\Delta$ SUVA         |               | Plant O       |                | Plant T |               |
|-----------------------|---------------|---------------|----------------|---------|---------------|
|                       |               | RW-SW         | SW-PW          | RW-SW   | SW-PW         |
| $\Delta$ DOC          | Pearson Corr. | -0.1256       | <b>-0.5668</b> | -0.2944 | 0.0138        |
|                       | p-value       | 0.6431        | 0.0221         | 0.1531  | 0.9479        |
| $\Delta$ UV260        | Pearson Corr. | <b>0.8502</b> | <b>0.7318</b>  | 0.3552  | <b>0.8778</b> |
|                       | p-value       | 0.0000        | 0.0013         | 0.0814  | 0.0000        |
| $\Delta$ Peak A       | Pearson Corr. | 0.2213        | <b>0.7769</b>  | -0.1929 | -0.0270       |
|                       | p-value       | 0.4101        | 0.0004         | 0.3556  | 0.8981        |
| $\Delta$ Peak C       | Pearson Corr. | 0.1841        | <b>0.7160</b>  | -0.1135 | -0.0640       |
|                       | p-value       | 0.4949        | 0.0018         | 0.5892  | 0.7610        |
| $\Delta$ Peak B       | Pearson Corr. | 0.1376        | <b>0.6258</b>  | 0.1679  | 0.0192        |
|                       | p-value       | 0.6114        | 0.0095         | 0.4224  | 0.9275        |
| $\Delta$ Peak T       | Pearson Corr. | 0.2010        | <b>0.7929</b>  | 0.0521  | -0.0246       |
|                       | p-value       | 0.4554        | 0.0002         | 0.8047  | 0.9069        |
| $\Delta \beta/\alpha$ | Pearson Corr. | -0.0948       | 0.3077         | 0.0418  | 0.1280        |
|                       | p-value       | 0.7269        | 0.2463         | 0.8428  | 0.5422        |
| $\Delta$ BIX          | Pearson Corr. | -0.0850       | 0.0990         | 0.0407  | 0.0720        |
|                       | p-value       | 0.7542        | 0.7152         | 0.8467  | 0.7323        |
| $\Delta$ FI           | Pearson Corr. | -0.1825       | <b>-0.5254</b> | 0.2683  | 0.0652        |
|                       | p-value       | 0.4988        | 0.0366         | 0.1947  | 0.7570        |
